# Supplementary material for: Interclass Switch between IL17 and IL23 Inhibitors in Psoriasis: A Real-Life, Long-Term, Single-Center Experience
Source: MDPI journal article supplement (doi:10.3390/jcm12247503), 2023-12-05
Supplement: s1 [file s1]

**Table S1.** General characteristics of the 48 patients that switched from IL17 to IL23 inhibitors and the PASI score trend from baseline to 52 weeks.

| No. of patients | Age | Sex | BMI | Age of onset | Type of psoriasis | PSA | Biologicals in course | Previous biological therapy                      | PASI baseline | PASI 16 weeks | PASI 90 16 weeks | PASI 100 16 weeks | PASI 128 weeks | PASI 90 28 weeks | PASI 100 28 weeks | PASI 48 weeks | PASI 100 48 weeks | PASI 100 48 weeks | Follow up (months) | Cause of IL17 inhibitors suspension | Obesity | Cardiovascular disease | Diabetes mellitus |
|-----------------|-----|-----|-----|--------------|-------------------|-----|-----------------------|--------------------------------------------------|---------------|---------------|------------------|-------------------|----------------|------------------|-------------------|---------------|-------------------|-------------------|--------------------|-------------------------------------|---------|------------------------|-------------------|
| 1               | 62  | m   | 27  | 47           | vulgar            | no  | risankizumab          | adalimumab ixekizumab                            | 9             | 3             | no               | no                | NA             | NA               | NA                | NA            | NA                | NA                | 8                  |                                     | no      | yes                    | no                |
| 2               | 61  | m   | 28  | 20           | vulgar            | yes | risankizumab          | adalimumab, certolizumab, secukinumab            | 6             | 6             | no               | no                | NA             | NA               | NA                | NA            | NA                | NA                | 3                  | primary inefficacy                  | no      | no                     | no                |
| 3               | 65  | f   | 26  | 24           | vulgar            | yes | risankizumab          | adalimumab, etanercept, certolizumab, ixekizumab | 15            | 0             | yes              | yes               | 0              | yes              | yes               | NA            | NA                | NA                | 9                  |                                     | no      | yes                    | no                |
| 4               | 67  | f   | 27  | 47           | vulgar            | no  | risankizumab          | adalimumab, etanercept, infliximab, ixekizumab   | 11            | 0             | yes              | yes               | 0              | yes              | yes               | 0             | yes               | yes               | 14                 |                                     | no      | no                     | no                |
| 5               | 78  | f   | 35  | 23           | vulgar            | no  | risankizumab          | adalimumab, etanercept, ixekiumab                | 16            | 5             | no               | no                | NA             | NA               | NA                | NA            | NA                | NA                | 6                  |                                     | yes     | yes                    | no                |
| 6               | 60  | m   | 30  | 23           | vulgar            | no  | guselkumab            | adalimumab, etanercept, secukinumab              | 10            | NA            | NA               | NA                | 4              | no               | no                | 3             | no                | no                | 18                 |                                     | yes     | NA                     | NA                |
| 7               | 67  | f   | 43  | 27           | vulgar            | no  | risankizumab          | adalimumab, infliximab, ixekizumab, brodalumab   | 19            | 1.5           | yes              | no                | 1.5            | yes              | no                | NA            | NA                | NA                | 10                 |                                     | yes     | yes                    | yes               |
| 8               | 57  | f   | 26  | 47           | vulgar            | yes | tildrakizumab         | adalimumab, ixekizumab                           | 11            | 0             | yes              | yes               | 0              | yes              | yes               | 0             | yes               | yes               | NA                 |                                     | no      | NA                     | NA                |
| 9               | 65  | m   | 29  | 41           | vulgar            | no  | risankizumab          | adalimumab, ixekizumab, brodalumab               | 17            | 1.5           | yes              | no                | 0              | yes              | yes               | NA            | NA                | NA                | 11                 |                                     | no      | yes                    | yes               |
| 10              | 53  | m   | 23  | 44           | vulgar            | no  | guselkumab            | adalimumab, secukinumab                          | 12            | 3             | no               | no                | 1              | yes              | no                | 1             | yes               | no                | 15                 |                                     | no      | NA                     | NA                |
| 11              | 58  | m   | 25  | 49           | vulgar            | no  | risankizumab          | adalimumab, secukinumab                          | 8             | 4             | no               | no                | 0              | yes              | yes               | NA            | NA                | NA                | 10                 |                                     | no      | yes                    | no                |
| 12              | 54  | m   | 26  | 37           | vulgar            | no  | risankizumab          | adalimumab, secukinumab, ixekizumab, brodalumab  | 8             | 3             | no               | no                | 1.5            | yes              | no                | NA            | NA                | NA                | 11                 |                                     | no      | yes                    | no                |
| 13              | 42  | m   | 24  | 15           | vulgar            | yes | guselkumab            | adalimumab, ustekinumab, ixekizumab              | 10.8          | 6             | no               | no                | 5              | no               | no                | 0             | yes               | yes               | 21                 |                                     | no      | NA                     | NA                |
| 14              | 58  | m   | 37  | 38           | vulgar            | yes | guselkumab            | adalimumab, ustekinumab, secukinumab             | 22            | 2             | yes              | no                | 0.5            | yes              | no                | 0             | yes               | yes               | 21                 |                                     | yes     | yes                    | yes               |

|    |    |   |    |    |                       |     |                  |                                                             |    |     |     |     |     |     |     |    |     |     |    |                           |     |     |    |
|----|----|---|----|----|-----------------------|-----|------------------|-------------------------------------------------------------|----|-----|-----|-----|-----|-----|-----|----|-----|-----|----|---------------------------|-----|-----|----|
| 15 | 41 | f | 22 | 26 | vulgar                | no  | risankizu<br>mab | adalimumab, ustekinumab,<br>secukinumab                     | 7  | 2   | no  | no  | NA  | NA  | NA  | NA | NA  | NA  | 8  |                           | no  | NA  | NA |
| 16 | 65 | f | 26 | 22 | erythr<br>ode<br>rmic | no  | guselkum<br>ab   | adalimumab,etanercept,inflximab,<br>ustekinumab, ixekizumab | 30 | 16. | no  | no  | 8   | no  | no  | 7  | yes | no  | 14 | lack of<br>efficacy       | no  | NA  | NA |
| 17 | 42 | m | 28 | 34 | vulgar                | no  | risankizu<br>mab | brodalumab                                                  | 8  | 0   | yes | yes | 0   | yes | yes | 0  | yes | yes | 13 |                           | no  | no  | no |
| 18 | 72 | f | 22 | 54 | vulgar                | no  | risankizu<br>mab | etanercept secukinumab                                      | 6  | 3   | no  | no  | 3   | no  | no  | 5  | no  | no  | 13 |                           | no  | no  | no |
| 19 | 58 | m | 23 | 36 | vulgar                | yes | guselkum<br>ab   | etanercept, infliximab, ixekizumab                          | 5  | 3   | no  | no  | 3   | no  | No  | 3  | no  | no  | 23 |                           | no  | yes | no |
| 20 | 53 | m | 27 | 23 | vulgar                | no  | risankizu<br>mab | etanercept, ixekizumab                                      | 10 | 4   | no  | no  | 1   | yes | No  | 1  | yes | no  | 14 |                           | no  | yes | no |
| 21 | 51 | m | 23 | 26 | vulgar                | no  | risankizu<br>mab | infliximab, ustekinumab,<br>secukinumab                     | 8  | 1.5 | yes | no  | 1.5 | yes | No  | NA | NA  | NA  | 9  |                           | no  | yes | no |
| 22 | 46 | m | 35 | 34 | vulgar                | no  | risankizu<br>mab | ixekizumab                                                  | 0  | 0   | yes | yes | NA  | NA  | NA  | NA | NA  | NA  | 8  |                           | yes | yes | no |
| 23 | 70 | f | 19 | 45 | vulgar                | no  | risankizu<br>mab | ixekizumab                                                  | 9  | 2   | no  | no  | NA  | NA  | NA  | NA | NA  | NA  | 8  |                           | no  | yes | no |
| 24 | 65 | m | 25 | 53 | vulgar                | no  | risankizu<br>ma  | ixekizumab                                                  | 10 | 1.5 | no  | no  | NA  | NA  | NA  | NA | NA  | NA  | 8  |                           | yes | yes | no |
| 25 | 74 | f | 24 | 74 | vulgar                | no  | guselkum<br>ab   | ixekizumab                                                  | 12 | 0   | yes | yes | 0   | yes | yes | 0  | yes | yes | 22 |                           | no  | NA  | NA |
| 26 | 62 | m | 27 | 46 | vulgar                | no  | risankizu<br>mab | ixekizumab                                                  | 8  | 15  | no  | no  | NA  | NA  | NA  | NA | NA  | NA  | 5  | primary<br>ineffica<br>cy | no  | yes | no |
| 27 | 73 | m | 23 | 50 | vulgar                | no  | risankizu<br>mab | ixekizumab                                                  | 17 | 1.5 | yes | no  | NA  | NA  | NA  | NA | NA  | NA  | 9  |                           | no  | yes | no |
| 28 | 65 | f | 25 | 4  | vulgar                | yes | guselkum<br>ab   | ixekizumab                                                  | 7  | 8   | no  | no  | NA  | NA  | NA  | NA | NA  | NA  | 4  | primary<br>ineffica<br>cy | no  | no  | no |
| 29 | 46 | m | 28 | 35 | vulgar                | no  | guselkum<br>ab   | ixekizumab                                                  | 11 | 0   | yes | yes | 0   | yes | yes | 0  | yes | yes | 17 |                           | no  | NA  | NA |
| 30 | 35 | m | 20 | 9  | vulgar                | no  | guselkum<br>ab   | ixekizumab                                                  | 12 | 0.5 | yes | no  | 0   | yes | yes | 0  | yes | yes | 18 |                           | no  | NA  | NA |
| 31 | 42 | m | 35 | 3  | guttate               | no  | risankizu<br>mab | ixekizumab                                                  | 10 | 3   | no  | no  | NA  | NA  | NA  | NA | NA  | NA  | 7  |                           | no  | no  | no |
| 32 | 43 | f | 25 | 41 | vulgar                | yes | risankizu<br>mab | ixekizumab, brodalumab                                      | 16 | 10  | no  | no  | 7   | no  | no  | NA | NA  | NA  | 8  | primary<br>ineffica<br>cy | no  | yes | no |

|    |    |   |    |    |         |    |                   |                          |     |     |     |     |     |     |     |    |     |     |    |                           |     |     |     |
|----|----|---|----|----|---------|----|-------------------|--------------------------|-----|-----|-----|-----|-----|-----|-----|----|-----|-----|----|---------------------------|-----|-----|-----|
| 33 | 67 | m | 27 | 45 | vulgar  | no | risankizu<br>mab  | ixekizumab, brodalumab   | 30  | 12  | no  | no  | 8   | no  | no  | NA | NA  | NA  | 10 |                           | no  | yes | no  |
| 34 | 75 | m | 41 | 50 | vulgar  | no | risankizu<br>mab  | ixekizumab, brodalumab   | 18  | NA  | NA  | NA  | NA  | NA  | NA  | NA | NA  | NA  | 1  |                           | yes | yes | no  |
| 35 | 67 | f | 28 | 60 | inverse | no | tildrakizu<br>mab | secukinumab              | 7   | 0   | yes | yes | 0   | yes | yes | 0  | yes | yes | 9  |                           | no  | yes | no  |
| 36 | 71 | f | 20 | 54 | vulgar  | no | tildrakizu<br>mab | secukinumab              | 17  | 1.5 | yes | no  | 0   | yes | yes | 0  | yes | yes | 9  |                           | no  |     |     |
| 37 | 77 | m | 30 | 68 | vulgar  | no | risankizu<br>mab  | secukinumab              | 8   | 1.5 | no  | no  | 1.5 | no  | no  | 0  | yes | yes | 12 |                           | no  | yes | yes |
| 38 | 53 | m | 23 | 21 | vulgar  | no | guselkum<br>ab    | secukinumab              | 13  | 6.5 | no  | no  | 3.5 | no  | no  | 7  | no  | no  | 22 |                           | no  | NA  | NA  |
| 39 | 59 | m | 36 | 54 | vulgar  | no | risankizu<br>mab  | secukinumab              | 8   | 6   | no  | no  | 6   | no  | no  | NA | NA  | NA  | 8  | primary<br>ineffica<br>cy | yes | no  | no  |
| 40 | 55 | m | 27 | 36 | vulgar  | no | risankizu<br>mab  | secukinumab              | 10  | 6   | no  | no  | 3   | no  | no  | NA | NA  | NA  | 11 |                           | no  | yes | no  |
| 41 | 44 | f | 24 | 38 | vulgar  | no | risankizu<br>mab  | secukinumab              | 6   | 0   | yes | yes | 0   | yes | yes | NA | NA  | NA  | 11 |                           | no  | yes | no  |
| 42 | 32 | m | 19 | 17 | vulgar  | no | guselkum<br>ab    | secukinumab              | 5.5 | 0   | yes | yes | 0   | yes | yes | 0  | yes | yes | 16 |                           | no  |     |     |
| 43 | 22 | f | 23 | 8  | vulgar  | no | risankizu<br>mab  | secukinumab brodalumab   | 10  | 3   | no  | no  | NA  | NA  | NA  | NA | NA  | NA  | 7  |                           | no  | no  | no  |
| 44 | 27 | m | 30 | 12 | vulgar  | no | risankizu<br>mab  | secukinumab ustekinumab  | 15  | 0   | yes | yes | 0   | yes | yes | NA | NA  | NA  | 13 |                           | no  | no  | no  |
| 45 | 50 | m | 28 | 26 | vulgar  | no | guselkum<br>ab    | secukinumab, ixekizumab  | 6   | 1.5 | yes | no  | 6   | no  | no  | NA | NA  | NA  | 7  | primary<br>ineffica<br>cy | no  | NA  | NA  |
| 46 | 48 | m | 26 | 28 | vulgar  | no | risankizu<br>mab  | ustekinumab secukinumab  | 9   | 1.5 | yes | no  | NA  | NA  | NA  | NA | NA  | NA  | 7  |                           | no  | no  | no  |
| 47 | 53 | f | 26 | 49 | guttate | no | risankizu<br>mab  | ustekinumab, ixekizumab  | 17  | 1.5 | yes | no  | 1.5 | yes | no  | 0  | yes | yes | 13 |                           | no  | no  | no  |
| 48 | 64 | m | 34 | 50 | vulgar  | no | guselkum<br>ab    | ustekinumab, secukinumab | 17  | 5   | no  | no  | 3   | no  | no  | 3  | no  | No  | 16 |                           | yes | NA  | NA  |
